# Supplementary material for: Potent human monoclonal antibodies targeting Epstein-Barr virus gp42 reveal vulnerable sites for virus infection
Source: PubMed Central journal article supplement — Cell Rep Med. 2024 May 21;5(5):101573. doi: 10.1016/j.xcrm.2024.101573 (PMC11148859; doi:10.1016/j.xcrm.2024.101573), 2024-05-21
Supplement: mmc1.pdf [file mmc1.pdf]

**Cell Reports Medicine, Volume 5**

**Supplemental information**

**Potent human monoclonal antibodies**

**targeting Epstein-Barr virus gp42**

**reveal vulnerable sites for virus infection**

**Ge-Xin Zhao, Xin-Yan Fang, Guo-Long Bu, Shuai-Jia-Bin Chen, Cong Sun, Ting Li, Chu Xie, Yu Wang, Shu-Xin Li, Ning Meng, Guo-Kai Feng, Qian Zhong, Xiang-Wei Kong, Zheng Liu, and Mu-Sheng Zeng**

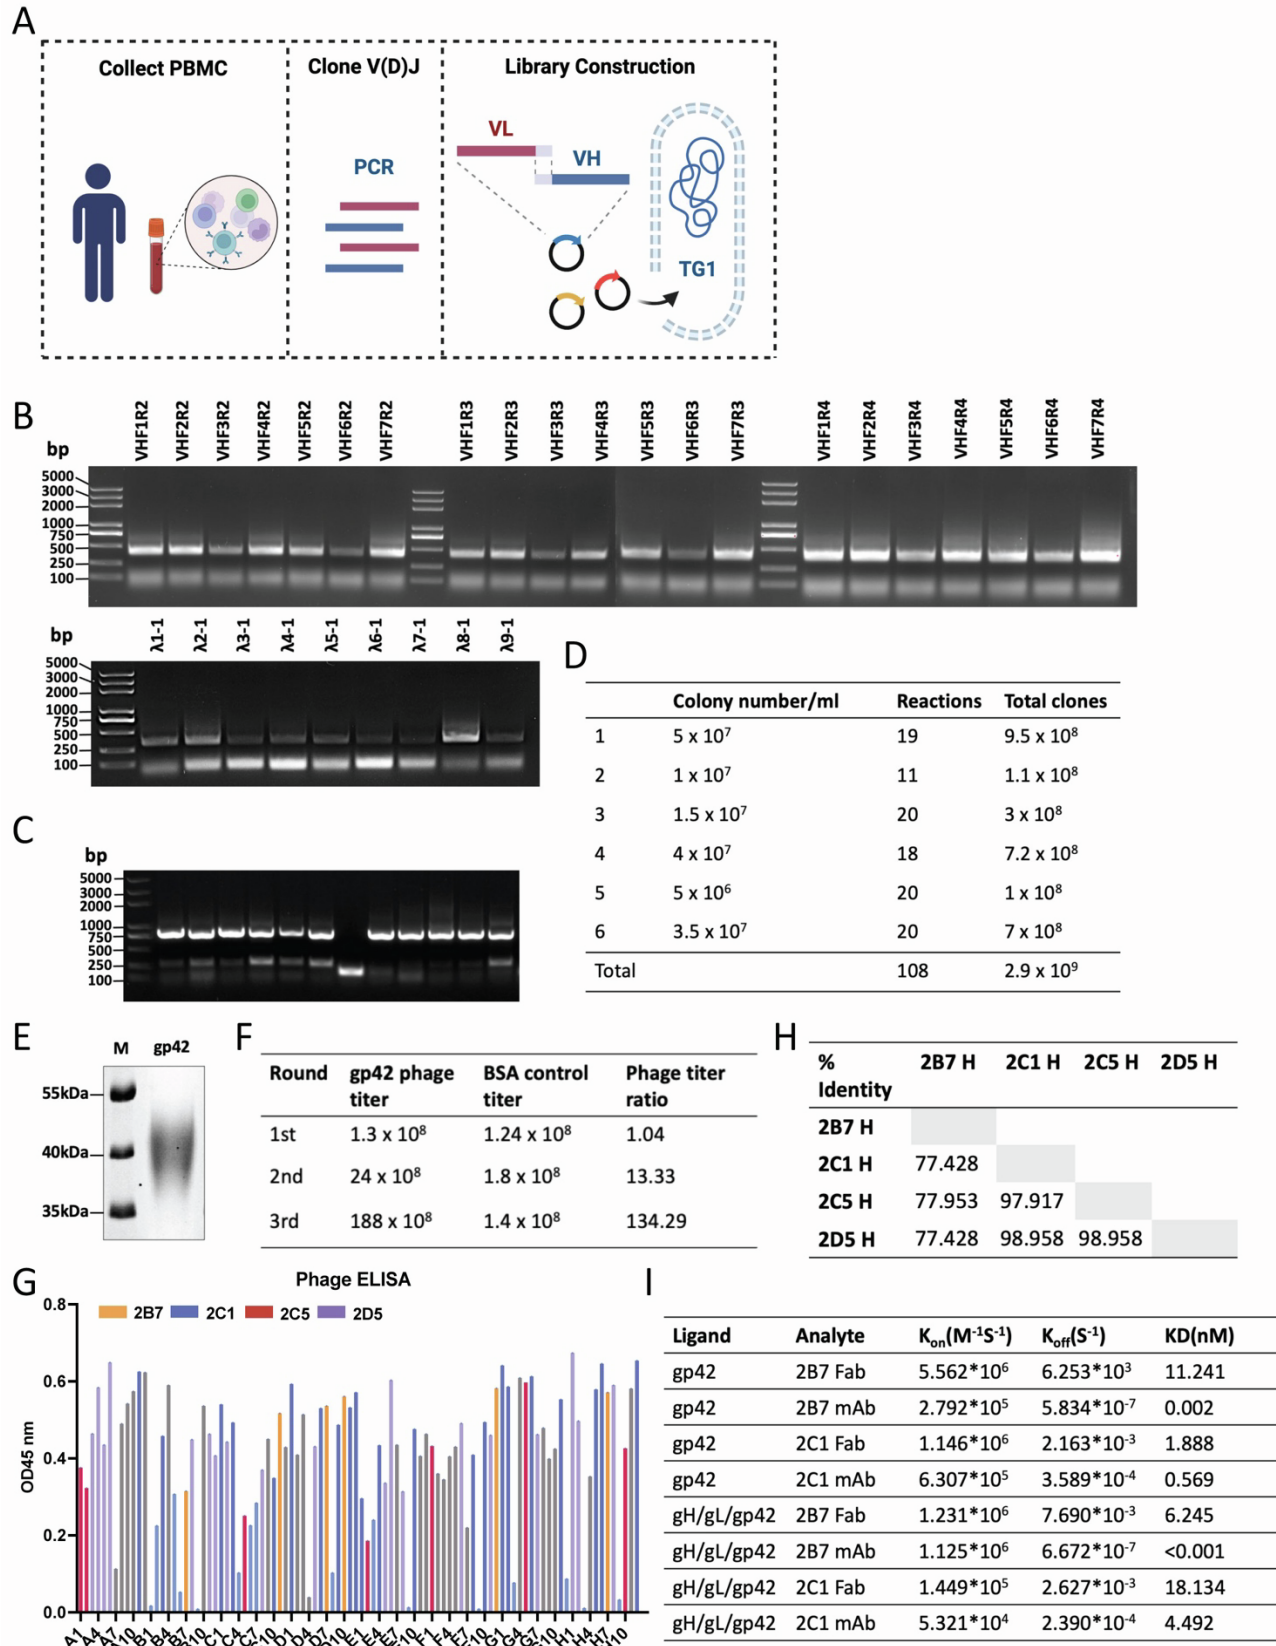

1  
2

Figure S1. Isolation and identification of high-affinity anti-gp42 antibodies. Related to Figure 1.

3 (A) The strategy of the construction of the human scfv phage library. V(D)J sequences encoding the variable regions  
4 of the heavy and light chains (vH and vL) are amplified from human PBMC. These sequences are then assembled as  
5 vL-vH using overlap PCR, inserted into the pComb3XSS vector, and introduced into E. coli (TG1 stain) using  
6 electroporation.

7 (B) Representative DNA gel image of vH and vL PCR products amplified from cDNA, which is reverse transcribed  
8 from RNA extracted from PBMCs of EBV-positive volunteers.

9 (C) Represent DNA gel image of the PCR amplification of vL-vH inserts from randomly selected TG1 clones of the  
10 scfv library. A product of about 750bp indicated that the E.coli TG1 containing the pComb3xss plasmid is  
11 successfully inserted with the vL-vH gene. The insertion rate is greater than 90% for each electroporation reaction.

12 (D) The efficiency of electroporation reactions (colony number/ml) was estimated by serial dilution of  
13 electroporated TG1. Six batches of electroporation for a total of 108 reactions were performed, resulting in an  
14 estimated library capacity of approximately  $2.9 \times 10^9$ .

15 (E) SDS-PAGE analysis of purified soluble gp42(34-223 aa). The protein was stained with Coomassie blue.

16 (F) Phage titers obtained from successive rounds of screening assessed through serial dilution of recovered-phage-  
17 infected TG1 cells on an ampicillin-containing agar plate. The phage titer ratio was determined by dividing the  
18 phage count from gp42-bound tubes by that from BSA-bound tubes. After three panning rounds, gp42-bound  
19 phages were eluted, infecting TG1 cells for subsequent ELISA screening.

20 (G) The affinity of individual phage clones to gp42 was detected using ELISA and sequenced. Differently colored  
21 symbols indicate distinct clones, while gray represents instances of failed sequencing, typically due to double peaks.

22 (H) Nucleotide sequence identity (%) of the heavy chain of 2B7, 2C1, 2C5, and 2D5.

23 (I) Bio-Layer Interferometry (BLI) measurements of apparent and binding affinities between gp42-specific  
24 antibodies/Fabs, and immobilized gp42 or the gH/gL/gp42 complex.

25

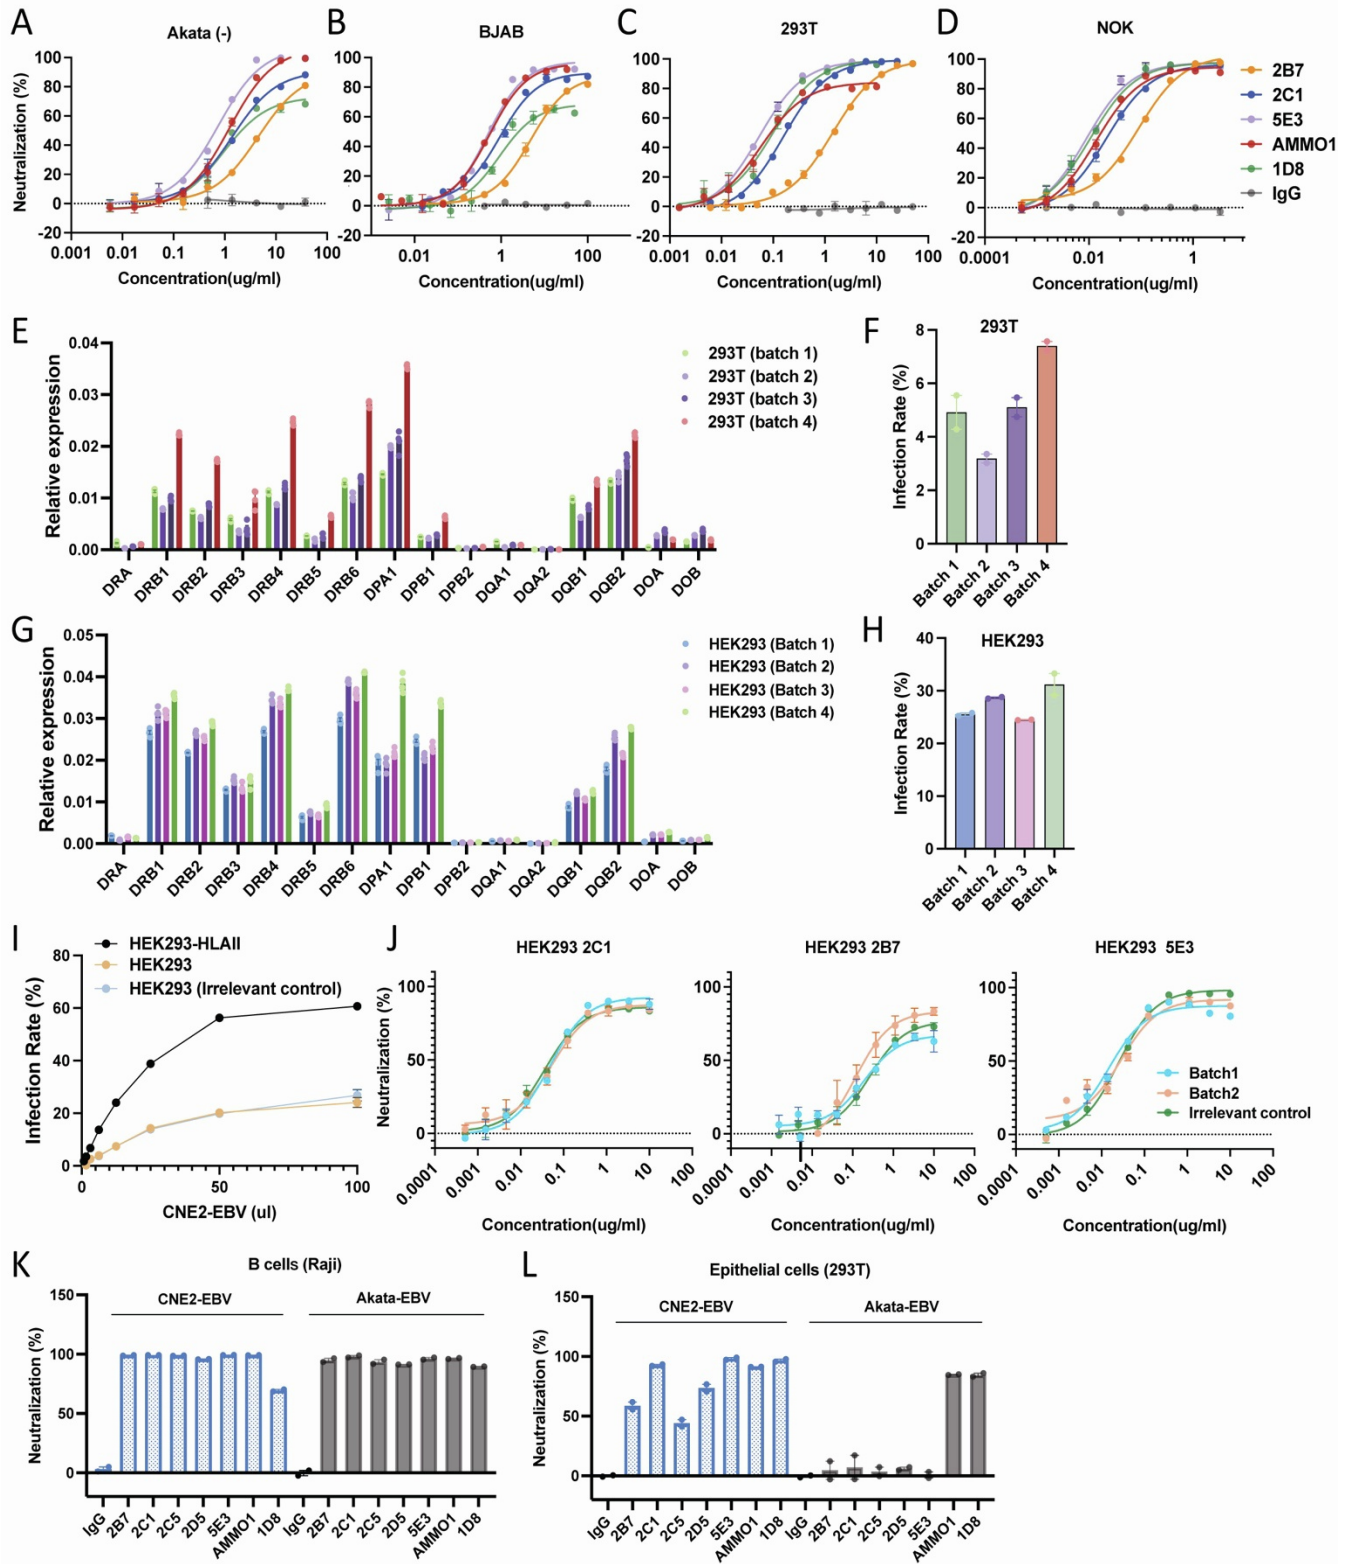

26

27

Figure S2. Neutralization effect of anti-gp42 antibodies in B and epithelial cells. Related to Figure 2.

28 (A-D) Neutralization assays evaluating the inhibitory effects of 2B7, 2C1, 5E3, AMMO1(anti-gH/gL), 1D8(anti-  
29 gH/gL), and control IgG in EBV-negative Akata B cell lines(A), BJAB B cell lines (B), 293T cell lines(C), and NOK  
30 cell lines(D). (n=3).

31 (E)Quantitative PCR (QPCR) analysis of human leukocyte antigen (HLA)-II gene expression in different batches of  
32 293T cells. The expression levels are presented as relative fold changes to the GAPDH gene. (n=4).

33 (F) Assessment of CNE2-EBV infection rate in various batches of 293T cells. Equal amounts of CNE2-EBV were  
34 added to each cell. (n=2).

35 (G) QPCR analysis of HLA-II gene expression in various batches of HEK293 cells. The expression levels presented  
36 as relative fold change to the GAPDH gene. (n=4).

37 (H) Evaluation of CNE2-EBV infection rate in various batches of HEK293 cells. Equal amounts of CNE2-EBV  
38 were added to each cell. (n=2).

39 (I) Infection rate of HEK293 and HEK293-HLAII cells with varying volumes of CNE2-EBV supernatants. HEK293  
40 (irrelevant control) represents HEK293 cells transfected with an irrelevant protein (T7 promoter). (n=3).

41 (J) Evaluation of the neutralizing efficacies of 2B7, 2C1, and 5E3 against EBV infection in different batches of  
42 HEK293 cells and HEK293 transfected with an irrelevant protein. (n=3).

43 (K-L) The neutralization ability of mAbs on CNE2-EBV or Akata-EBV infection was evaluated in Raji B cells (K)  
44 and 293T epithelial cells (L). 1 µg/ml mAb was added in each well. (n=2).

45 Error bars represent ± SEM.

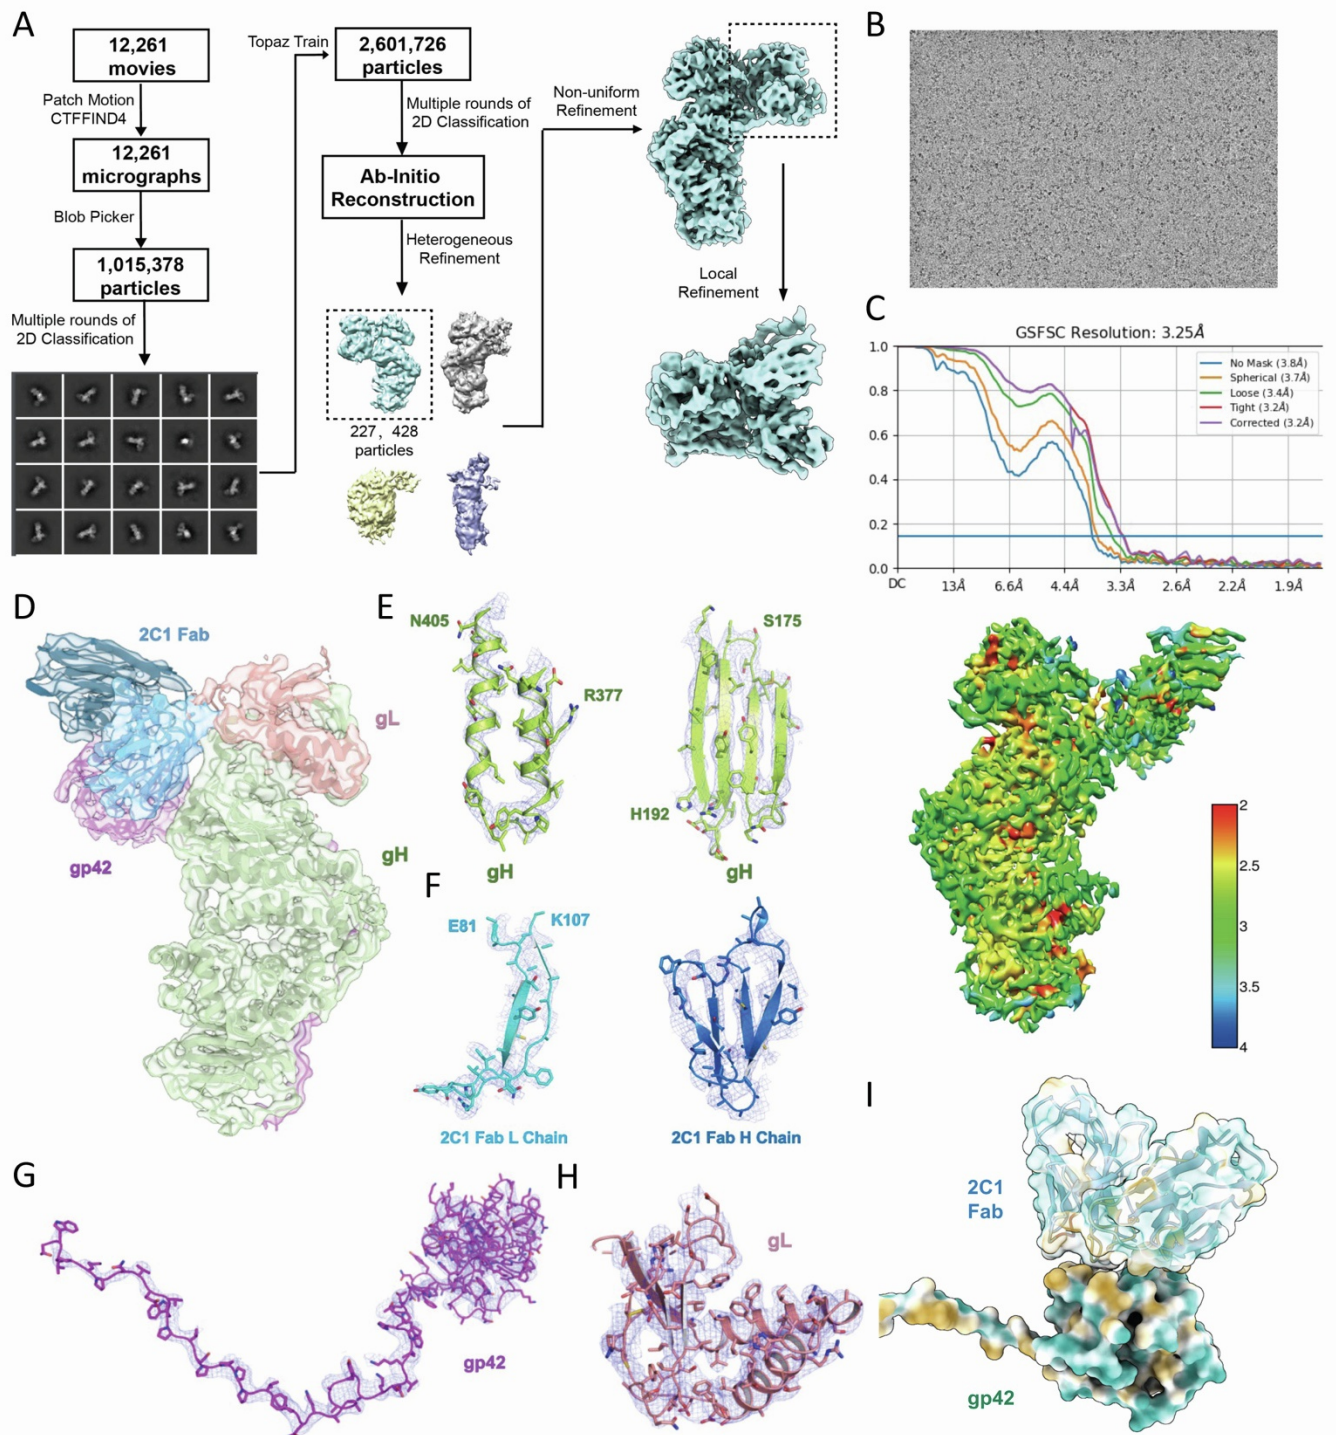

46

47 **Figure S3. Cryo-EM Image Processing and Structural Analysis of EBV gH/gL/gp42/2C1-Fab Complex.**

48 **Related to Figure 3.**

49 (A) An overview of the cryo-EM image processing and reconstruction workflow.

50 (B) Representative cryo-EM micrograph of the gH/gL/gp42-2C1 Fab.

51 (C) The FSC curves for the reconstruction (upper) and Cryo-EM map of EBV gH/gL/gp42/2C1-Fab, colored by  
52 local resolution (Å) (lower).  
53 (D) Overview of the gH/gL/gp42-2C1 Fab complex fitting into the cryo-EM density map. gH, gL, gp42, 2C1 fab  
54 heavy chain, and 2C1 fab light chain are colored green, salmon, purple, dark blue, and light blue, respectively;  
55 (E-H) Detailed views showing the fit of side chains from different subunits into the corresponding cryo-EM  
56 volumes.  
57 (I) Hydrophobic protein surface representation of 2C1 fab and EBV gp42, hydrophilic amino acids are colored blue,  
58 and hydrophobic amino acids are colored yellow.

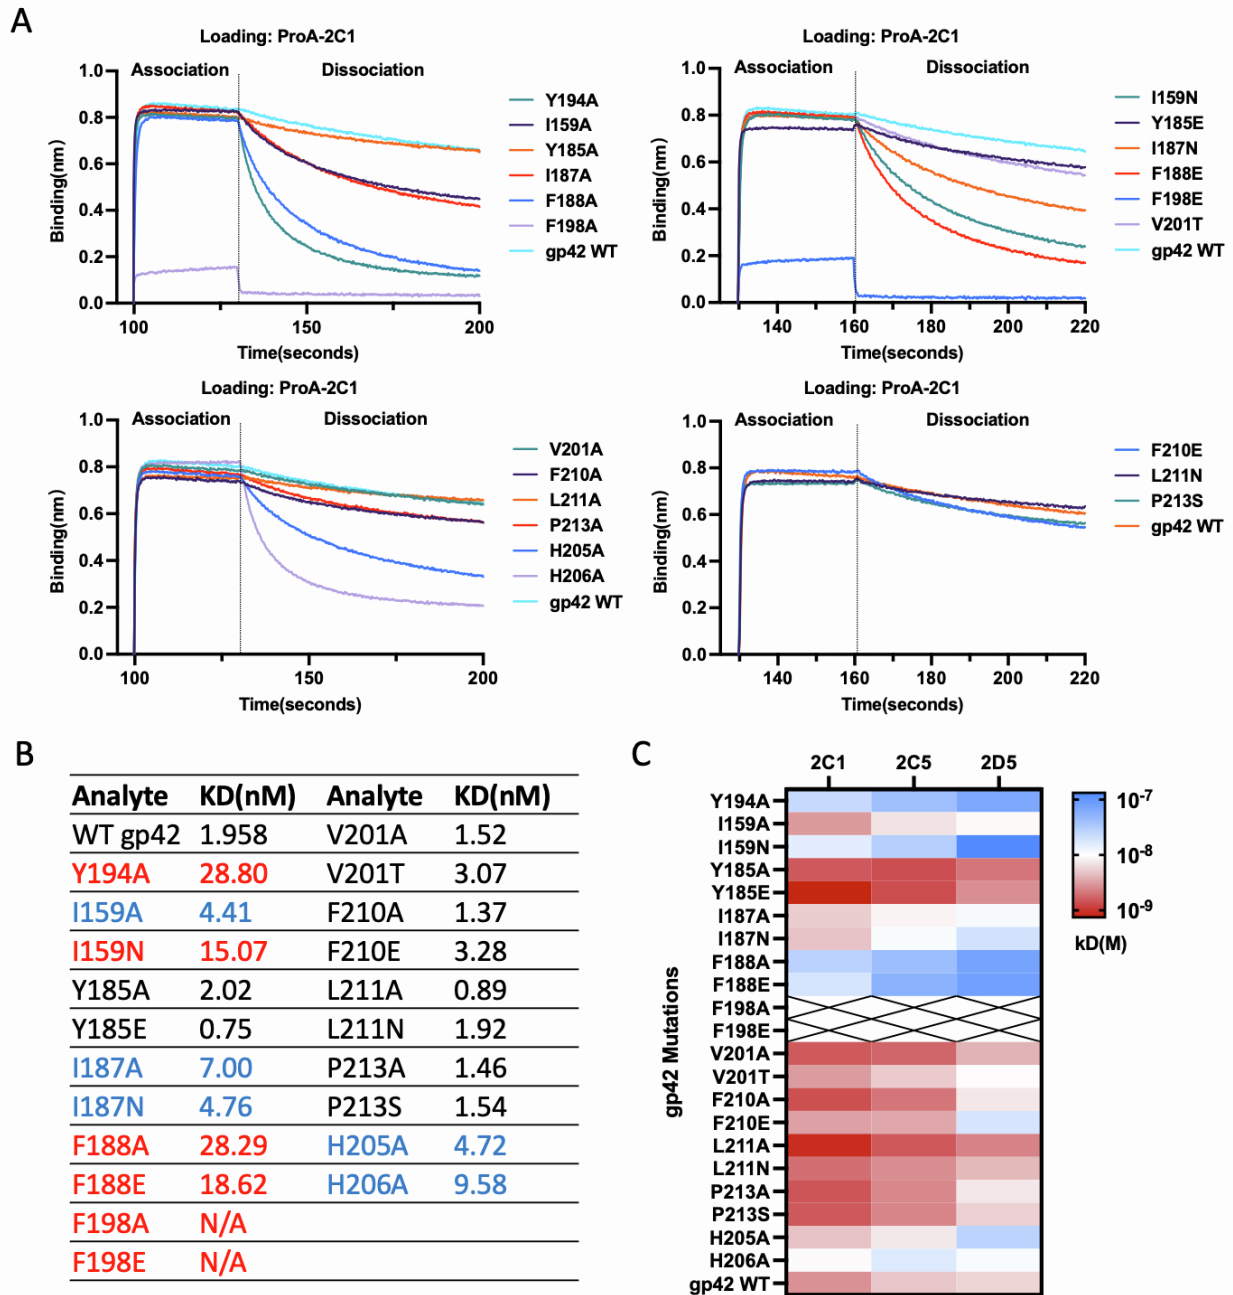

59

60 **Figure S4. Characterization of apparent affinity changes of 2C1 to gp42 mutants. Related to Figure 3.**

61 (A) 2C1 was immobilized on Protein A sensors, and the apparent affinity of 2C1 to various gp42 mutants was  
 62 assessed by BLI. WT refers to the wide-type gp42.

63 (B) The dissociation constant (kD) values corresponding to the apparent affinities of 2C1 to gp42 mutations,  
 64 determined based on BLI data (average of two independent assays). Values are reported in nanomolar (nM).

65 Mutations with the most significant effects on affinity (>10nM) are labeled in red, while moderately affected  
 66 mutations (4~10nM) are labeled in blue.



67 (C) The heatmap represents variations in the apparent affinity (kD) of 2C1, 2C5, and 2D5 to gp42 caused by amino  
68 acid substitutions in gp42.

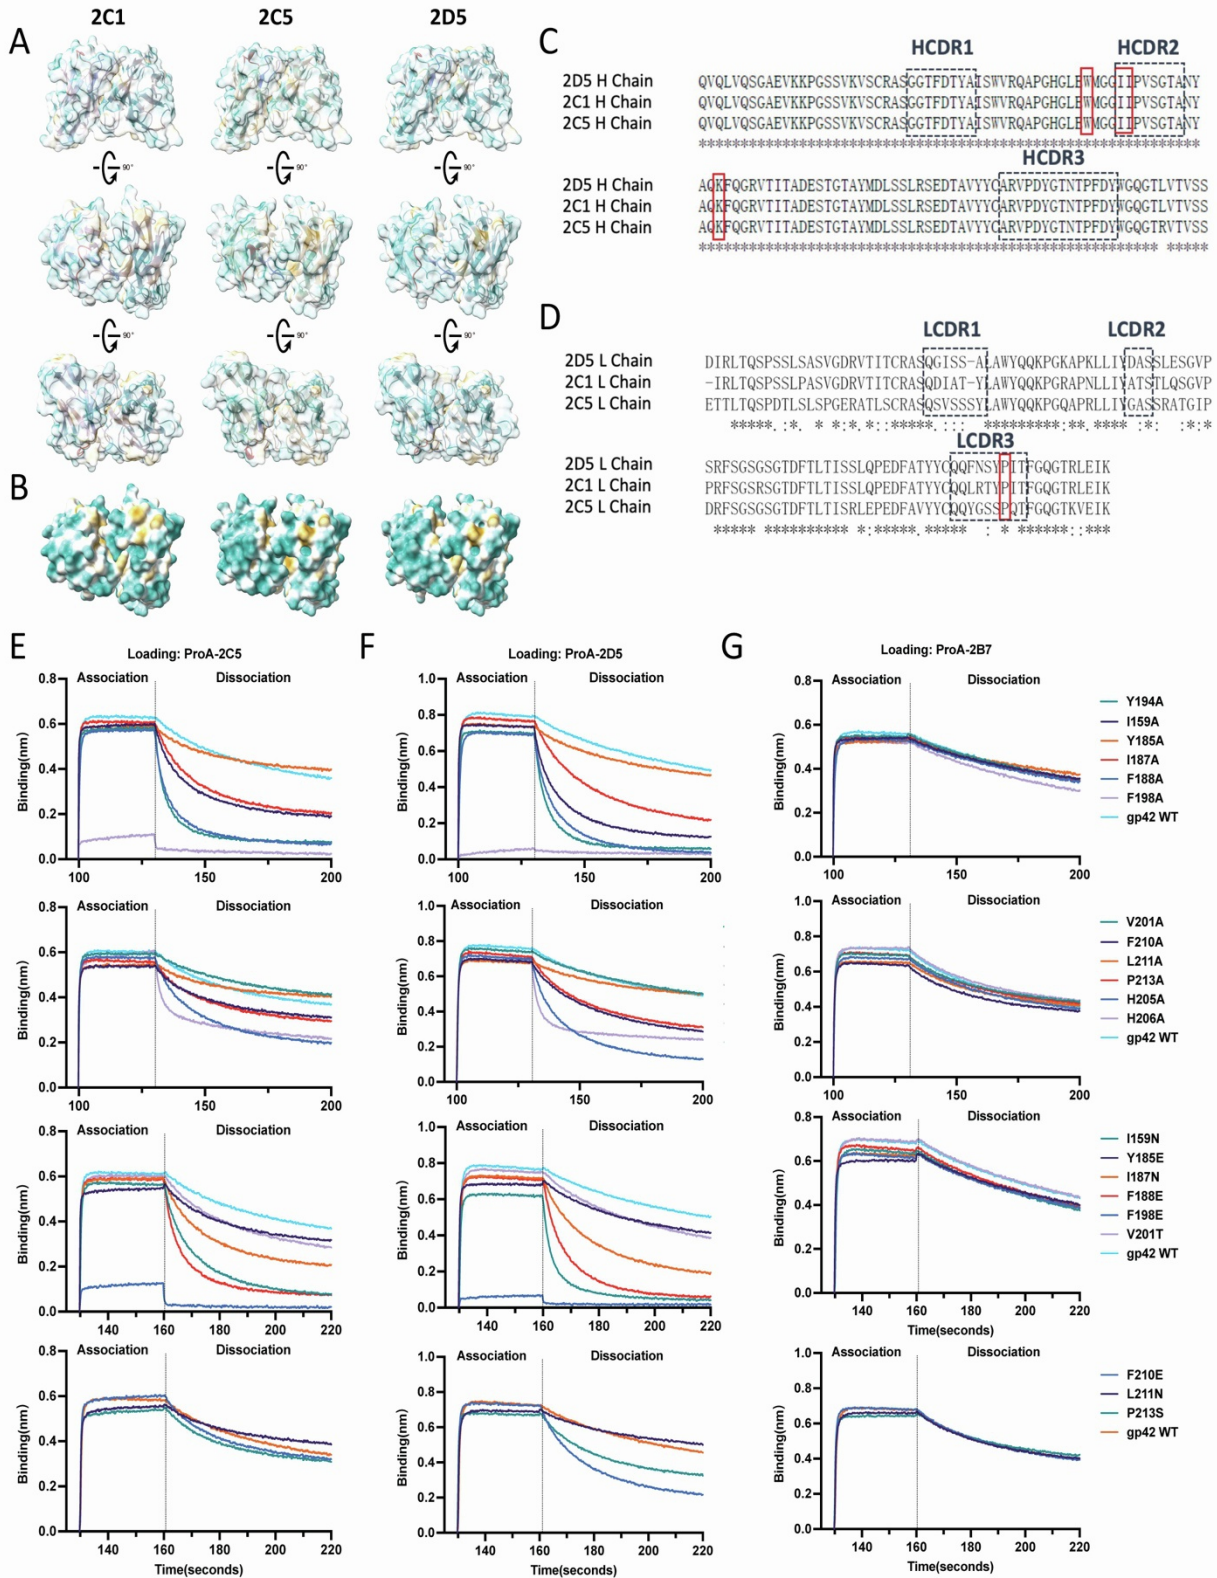

69

70

71

Figure S5. Prediction models of 2C1, 2C5, and 2D5 Fabs and Assessment of Apparent Affinity. Related to Figure 3.

72 (A) Prediction models of 2C1, 2C5, and 2D5 Fabs are shown in three different views, and CDRs of the VL are  
73 colored differently. The hydrophobic surface is indicated by yellow for hydrophobic amino acids and blue for  
74 hydrophilic amino acids, displayed as semi-transparent surfaces. Structures are predicted by tFold-Ab [S1].  
75 (B) The hydrophobic surface of 2C1, 2C5, and 2D5 Fabs viewed from the gp42 interaction surface.  
76 (C) Sequence alignment of the heavy chains of 2C1, 2C5, and 2D5. The CDRs were labeled in black frames, and the  
77 conserved residues within the hydrophobic pockets of the interaction surface are highlighted in red frames.  
78 (D) Sequence alignment of the light chains of 2C1, 2C5, and 2D5, highlighting the conserved residue within the  
79 hydrophobic pockets.  
80 (E-G) 2C5(E), 2D5(F), and 2B7(G) mAbs were immobilized on Protein A sensors, followed by interacting with  
81 various gp42 mutants to assess their apparent affinity using bio-layer interferometry(BLI).

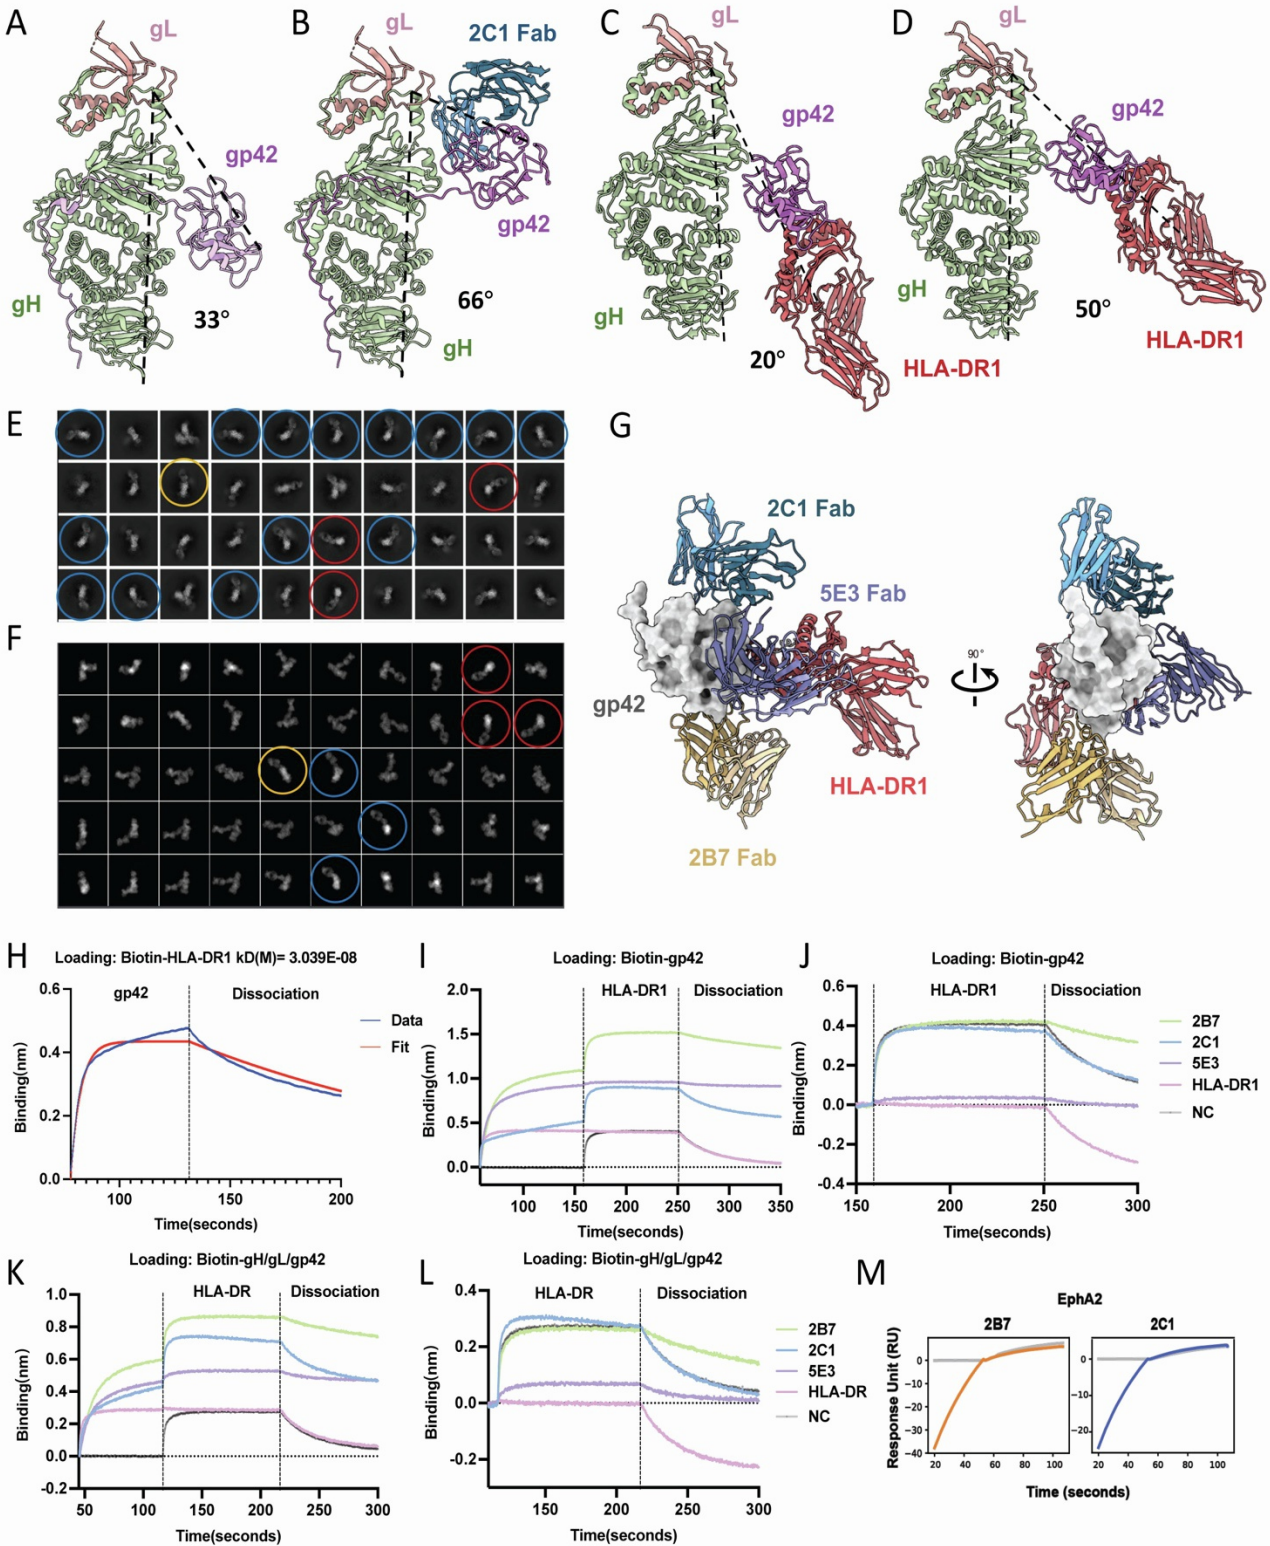

82  
83

**Figure S6. 2B7 and 2C1 antibodies reveal two distinct sites on gp42. Related to Figure 4.**

84 (A) The crystal structure of the gH/gL/gp42 complex (PDB: 5T1D) reveals an angle of approximately 33° between  
85 gp42 (purple) and gH/gL (green and salmon).

86 (B) The Angle between gp42 and gH/gL in the structure of gH/gL-gp42-2C1 Fab complex is about 66°. The  
87 structure of EBV gp42, gH, gL, and 2C1 Fab are colored purple, green, salmon, and blue, respectively.

88 (C-D) Two different conformations of the gH/gL-gp42-HLA complex: closed (C) and open (D). The angles of gp42  
89 and gH/gL in closed and open conformation are 20° and 50°, respectively. The crystal structure PDB of EBV gH/gL  
90 (green and salmon) and gp42 (purple)/HLA-DR1 (red) complex is 3PHF and 1KG0, respectively. (C-D) is adapted  
91 from [S2].

92 (E-F) The 2D classification results of gH/gL/gp42-2B7 Fab complex (E) and the projection of merged gH/gL/gp42-  
93 2B7 Fab model (F). Circles of the same color indicate projections of the same or similar orientation.

94 (G) Structure model of gp42(grey) in complex with HLA-DR1(red), 2C1 Fab (blue), 2B7 Fab (yellow), and 5E3 Fab  
95 (purple) [S3].

96 (H) Binding of gp42 to immobilized biotin-conjugated HLA-DR1 measured by BLI.

97 (I-J) Competition binding of 2B7, 2C1, or 5E3 with HLA-DR1 to immobilized gp42 was measured using bio-layer  
98 interferometry (BLI) (I). The binding shift was aligned at the HLA-DR1 loading step (158.8s) to visualize the  
99 competition (J).

100 (K-L) Competition binding of 2B7, 2C1, or 5E3 with HLA-DR1 to immobilized gH/gL/gp42 was assessed using  
101 BLI (K). To visualize the competition, the binding shift was aligned at the HLA-DR1 loading step (116.6s) (L).

102 (M) Competition binding of 2B7 or 2C1 with EphA2 to immobilized gH/gL/gp42 measured by Surface Plasmon  
103 Resonance (SPR).

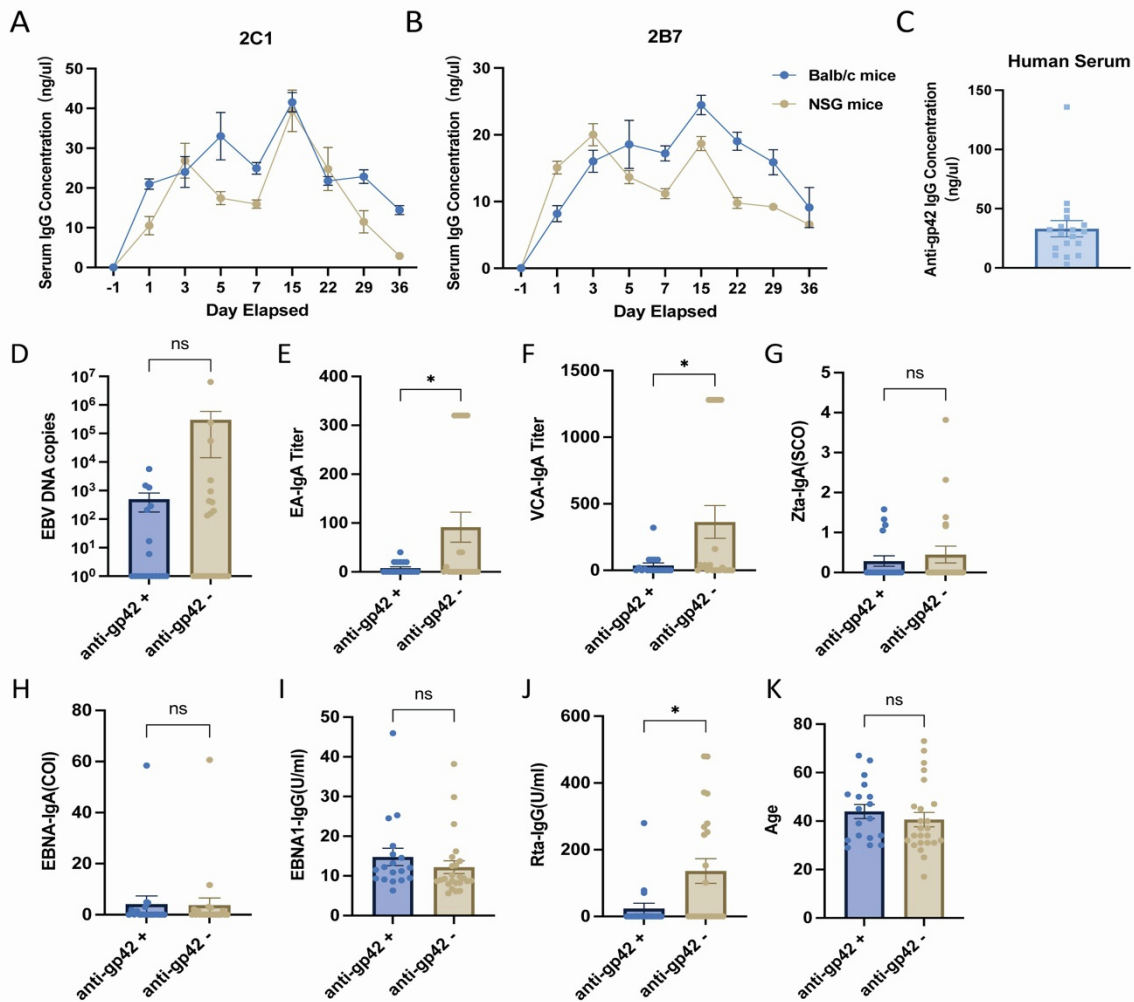

104

105 **Figure S7. Evaluation of Antibody Concentrations in Mice and Human Serum. Related to Figures 5 and 7.**

106 (A-B) Evaluation of mice serum concentration of 2C1 (A) and 2B7(B) using ELISA. Balb/c or NSG mice were  
 107 administered 200 µg of mAbs intraperitoneally on days -1, 2, 7, and 14. The ELISA plates were coated with gp42  
 108 protein (100 ng/well), and purified 2C1 mAb was used as a quantitative control. (n=3).

109 (C) Measurement of gp42-specific antibody concentrations in serum from healthy virus carriers using ELISA. Gp42  
 110 protein was used for coating the ELISA plates(100ng/well), and purified 2C1 mAb was used as the quantitative  
 111 control. (n=18).

112 (D-K) A comparison of various parameters between anti-gp42 positive (18/40) and anti-gp42 negative (22/40) EBV  
 113 carriers. The data includes EBV DNA copies number (D), EA-IgA (E), VCA-IgA (F), Zta-IgA (G), EBNA1-IgA(H),  
 114 EBNA1-IgG(I), Rta-IgG (J), and age (K) of the EBV carriers. SCO, Signal-to-Cut-off. COI, Cut-off index. The  
 115 SCO and COI are calculated from the mean optical densities of the sample and Cut-off value (OD<sub>sample</sub>/standard).  
 116 Human antibody detection was performed using an anti-human IgG HRP antibody (Abcam, ab97160).

117 **Supplementary Table S1. Model statistics of gH/gL/gp42-2C1 structure. Related to Figure 3.**

| EBV gH/gL/gp42-2C1 map                              |                 |
|-----------------------------------------------------|-----------------|
| Data collection and processing                      |                 |
| Microscope                                          | FEI Titan Krios |
| Camera                                              | Gatan K3        |
| Magnification                                       | 105,000         |
| Voltage(kV)                                         | 300             |
| Electron exposure (e <sup>-</sup> /Å <sup>2</sup> ) | 50              |
| Defocus range (µm)                                  | -1.0 ~ -2.0     |
| Pixel size (Å)                                      | 0.855           |
| Frames/movie                                        | 32              |
| Movies (total)                                      | 12, 193         |
| Initial particle images (no.)                       | 1,015,378       |
| Final particle images (no.)                         | 227, 428        |
| Symmetry imposed                                    | C1              |
| Map resolution (Å)                                  |                 |
| FSC threshold                                       | 0.143           |
| Map resolution range (Å)                            | 2 - 6           |
| Model composition                                   |                 |
| Non-hydrogen atoms                                  | 8328            |
| Protein residues                                    | 1138            |
| Ligands                                             | 0               |
| R.m.s. deviations                                   |                 |
| Bond lengths (Å)                                    | 0.02            |
| Bond angles (°)                                     | 0.536           |
| Validation                                          |                 |
| MolProbity score                                    | 1.87            |
| Clashscore                                          | 7.38            |
| Poor rotamers (%)                                   | 0.12            |
| Ramachandran plot                                   |                 |
| Favored (%)                                         | 92.6%           |
| Allowed (%)                                         | 7.4%            |
| Disallowed (%)                                      | 0               |

118  
119

120 **Supplementary Table S2. qPCR primers of HLA-II expression. Related to Figure 5.**

| HLA-II genes | Forward Primers          | Reverse Primers         |
|--------------|--------------------------|-------------------------|
| HLA-DRA      | AGCTGTGGACAAAGCCAACCTG   | CTCTCAGTCCACAGGGCTGTT   |
| HLA-DRB1     | GAGCAAGATGCTGAGTGGAGTC   | CTGTTGGCTGAAGTCCAGAGTG  |
| HLA-DRB2     | CTGTGAGTGGTTTCTATCCAGGC  | CGAGGAACTGTTTCCAGCATCAC |
| HLA-DRB3     | TTCCAGACCCTGGTGATGCTAG   | GACTCCACTCAGCATCTTGCTC  |
| HLA-DRB4     | GCTGGAAACAGTTCCTCGGAGT   | GACTCCACTCAGCATCTTGCTC  |
| HLA-DRB5     | GAACAGCCAGAAGGACTTCCTG   | GCAGGATACACAGTCACCTTAGG |
| HLA-DRB6     | CACGGACTGAATCTGCACAGAG   | CTGTTGGCTGAAGTCCAGAGTG  |
| HLA-DPA1     | ATCCAGCGTTCCAACCACACTC   | CGTTGAGCACTGGTGGGAAGAA  |
| HLA-DPB1     | GTGCAGACACAACACTACGAGCTG | CCTGGGTAGAAATCCGTCACGT  |
| HLA-DPB2     | TGCGGCTCATATCTGTGGTCCA   | CACTGCGCTGTCAAATGCACG   |
| HLA-DQA1     | GCATTGTGGTGGGCACTGTCTT   | TCTTCTGCTCCTGTAGATGGCG  |
| HLA-DQA2     | GAGACAGTCCAACCTCTACCGCT  | CCATTGCTCAGCCAGGTGATGT  |
| HLA-DQB1     | GAGCAAGATGCTGAGTGGCGTT   | GTCTCAGGAGTCAGTGCAGAAG  |
| HLA-DQB2     | GTGTGCAGACACAACACTACGAGG | TCACTGAGCAGACCAGCAGGTT  |
| HLA-DOA      | ATCGCCGCAATCAAAGCCCATC   | TGCAGATGAGGATGTTGGGCTG  |
| HLA-DOB      | CCAGATGCTGAGCAGTGGAACA   | GGTACACTGTACCTCTGGTTG   |

121 HLA: Human leukocyte antigen.



122 SUPPLEMENTAL REFERENCES

- 123 S1. Wu, J., Wu, F., Jiang, B., Liu, W., and Zhao, P. (2022). tFold-Ab: Fast and Accurate Antibody Structure  
124 Prediction without Sequence Homologs. Preprint at bioRxiv, 10.1101/2022.11.10.515918  
125 10.1101/2022.11.10.515918.
- 126 S2. Sathiyamoorthy, K., Jiang, J., Hu, Y.X., Rowe, C.L., Möhl, B.S., Chen, J., Jiang, W., Mellins, E.D., Longnecker,  
127 R., Zhou, Z.H., et al. (2014). Assembly and Architecture of the EBV B Cell Entry Triggering Complex. PLoS  
128 Pathog 10, e1004309. 10.1371/journal.ppat.1004309.
- 129 S3. Hong, J., Zhong, L., Liu, L., Wu, Q., Zhang, W., Chen, K., Wei, D., Sun, H., Zhou, X., Zhang, X., et al. (2023).  
130 Non-overlapping epitopes on the gHgL-gp42 complex for the rational design of a triple-antibody cocktail  
131 against EBV infection. Cell Rep Med 4, 101296. 10.1016/j.xcrm.2023.101296.

132
